# Supplementary material
Source: publisher site journal article supplement (https://www.spandidos-publications.com/4538/downloadSupplementary)

Figure S1. Head computed tomography performed 1 month after discharge showing that each ventricle is unobstructed and that the intraventricular hemorrhage is completely absorbed. The fourth (A) and the third ventricle (B) are unobstructed. (C and D) The lateral ventricle is unobstructed, with embolic glue artifacts in the left ventricle.

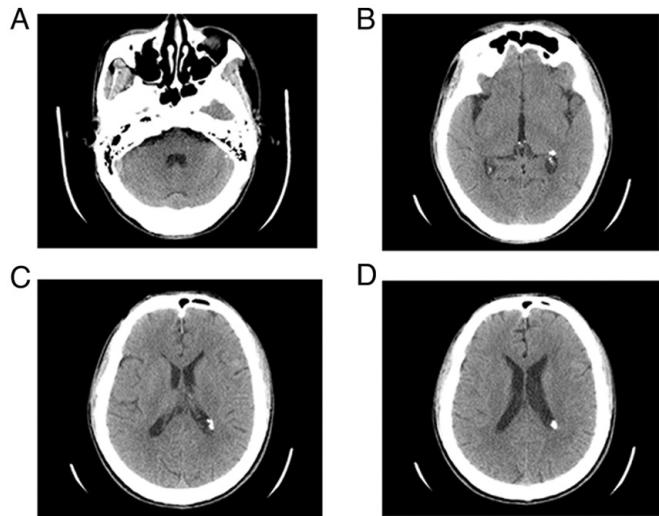

Supplement: Supplementary file 1 [file downloadSupplementary]
